# Supplementary material for: Predicting asymmetric phospholipid microstructures in solutions
Source: Royal Society of Chemistry journal article supplement (doi:10.1039/d0ra03732j), 2020-01-01
Supplement: d0ra03732j1.pdf [file d0ra03732j1.pdf]

## **Predicting asymmetric phospholipid microstructures in solutions**

**Yue Shan<sup>a</sup>, Yongyun Ji<sup>a</sup>, Xianghong Wang<sup>a</sup>, Linli He<sup>a</sup>, and Shibei Li<sup>\*,a</sup>**

<sup>a</sup>*Department of Physics, Wenzhou University, Wenzhou, Zhejiang 325035, China.*

\*Authors to whom correspondence should be addressed.

Electronic addresses: [shibenli@wzu.edu.cn](mailto:shibenli@wzu.edu.cn) (S. Li)

Fig. S1

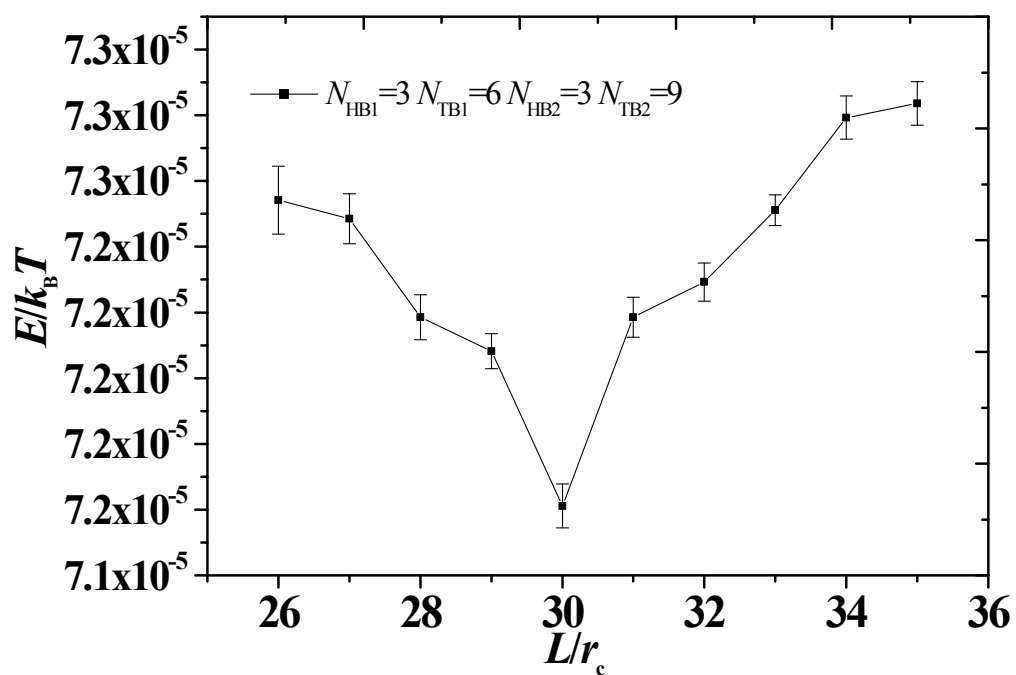

Fig.S1 The average energy of molecule as function of box size  $L$ . The phospholipid with the parameter of  $N_{HB1}=3$ ,  $N_{HB2}=3$ ,  $N_{TB1}=6$ , and  $N_{TB2}=9$ .

Fig.S2

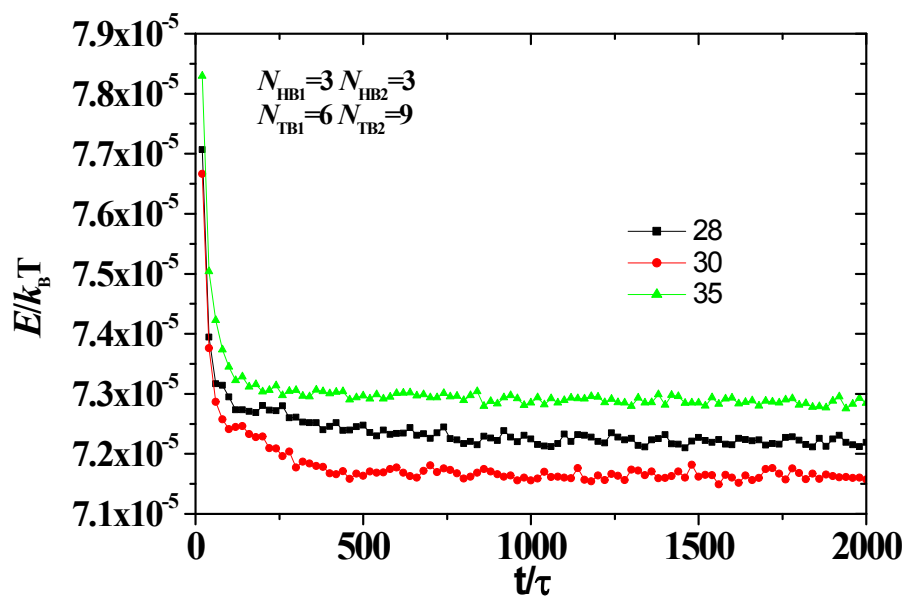

Fig.S2 The average energy of molecule as function of time step. The phospholipid with the parameter of  $N_{HB1}=3$ ,  $N_{HB2}=3$ ,  $N_{TB1}=6$ , and  $N_{TB2}=9$ . The box sizes  $L$  are set to be  $L=28r_c$ ,  $30r_c$  and  $35r_c$ .

Fig.S3

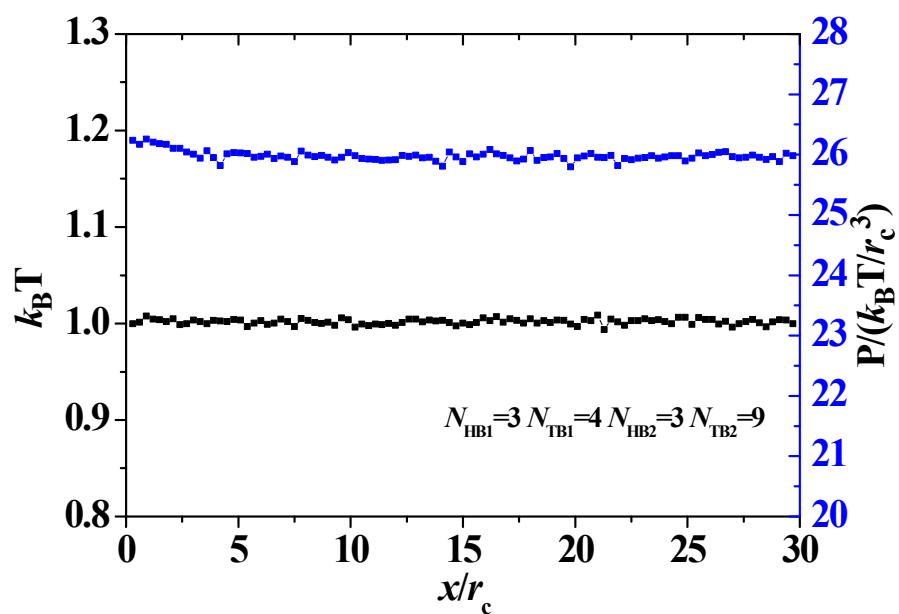Fig.S3 The local pressure  $P$  and temperature  $T$  as functions of  $x$ .

Fig.S4

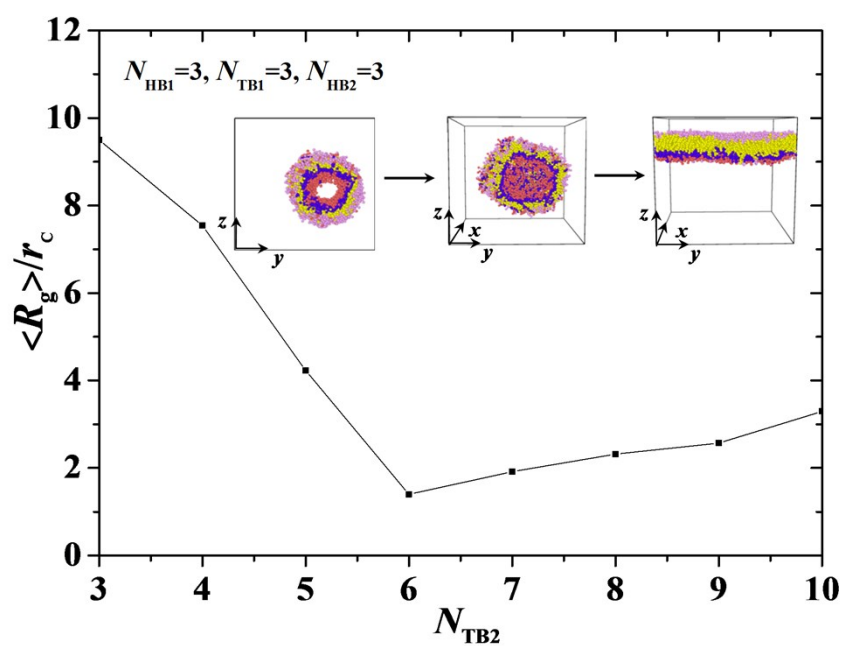

Fig.S4 The average of radius of gyration as a function of  $N_{TB2}$ , with  $N_{HB1} = 3$ ,  $N_{TB1} = 3$ , and  $N_{HB2} = 3$ . The corresponding asymmetric structures are also inserted.
